# Supplementary material for: Association between alcohol and urolithiasis: a mendelian randomization study
Source: Springer Nature journal article supplement (doi:10.1007/s00240-023-01472-0), 2023-08-15
Supplement: MOESM1 [file 25925120]

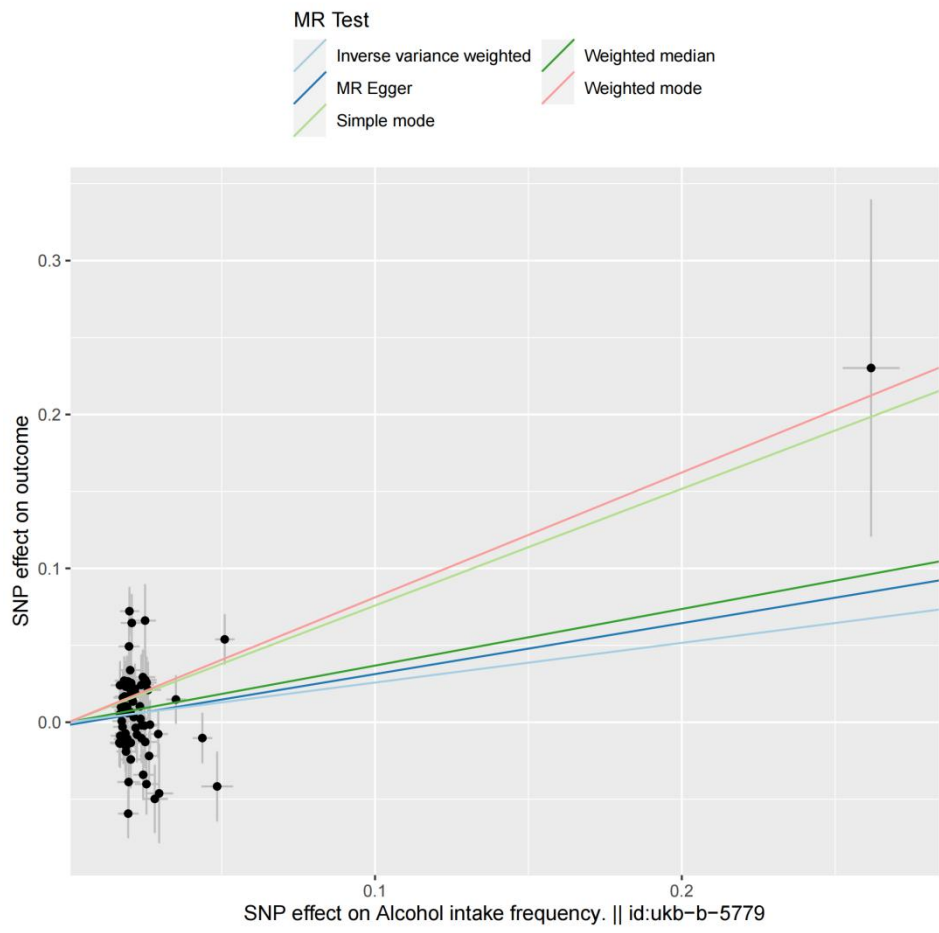

Figure S1. Scatter plot of SNPs associated with AIF and their risk of kidney stone after outliers removal with MR-PRESSO .

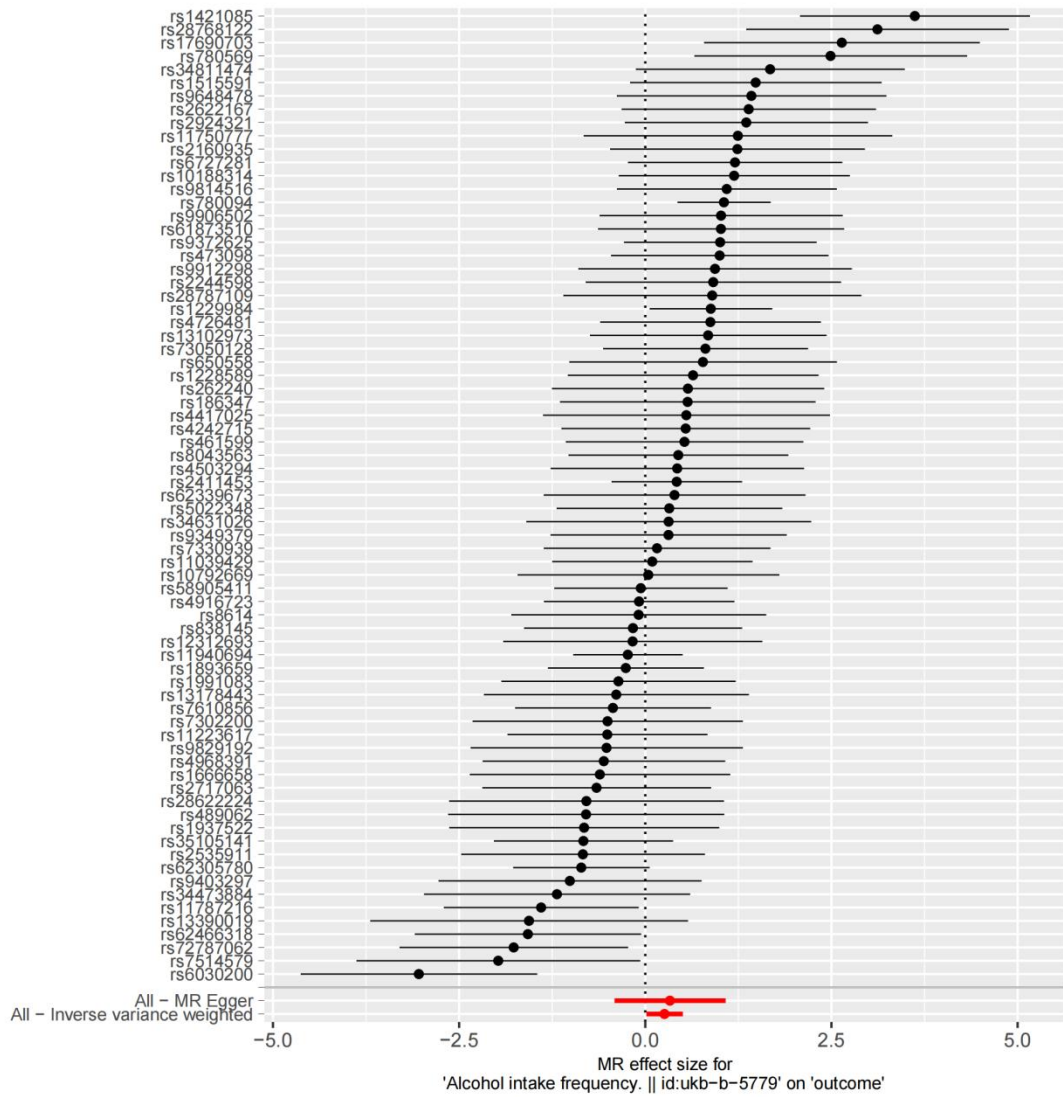

Figure S2. Forest plot of SNPs associated with AIF and their risk of kidney stone after outliers removal with MR-PRESSO .

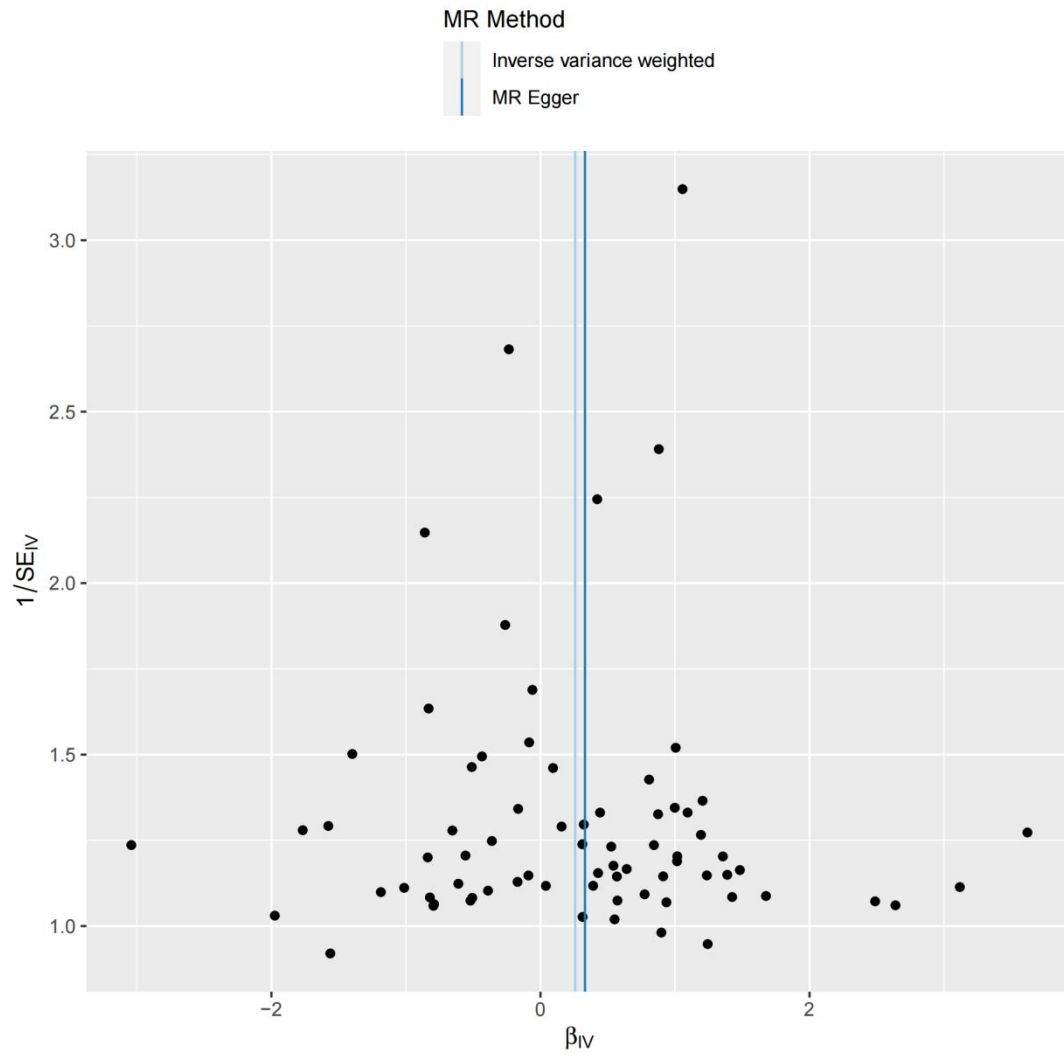

Figure S3. Funnel plot of SNPs associated with AIF and their risk of kidney stone after outliers removal with MR-PRESSO .

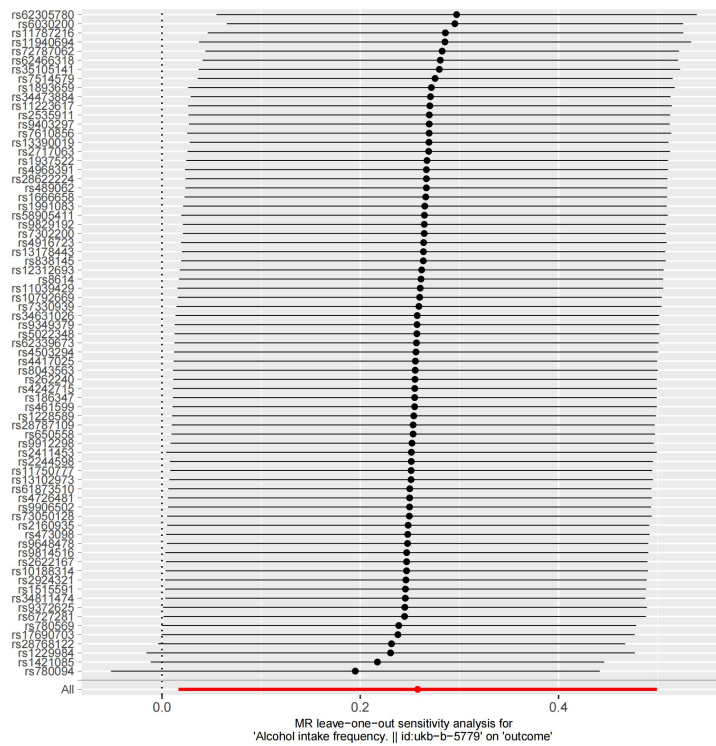

Figure S4. Leave-one-out of SNPs associated with AIF and their risk of kidney stone after outliers removal with MR-PRESSO.

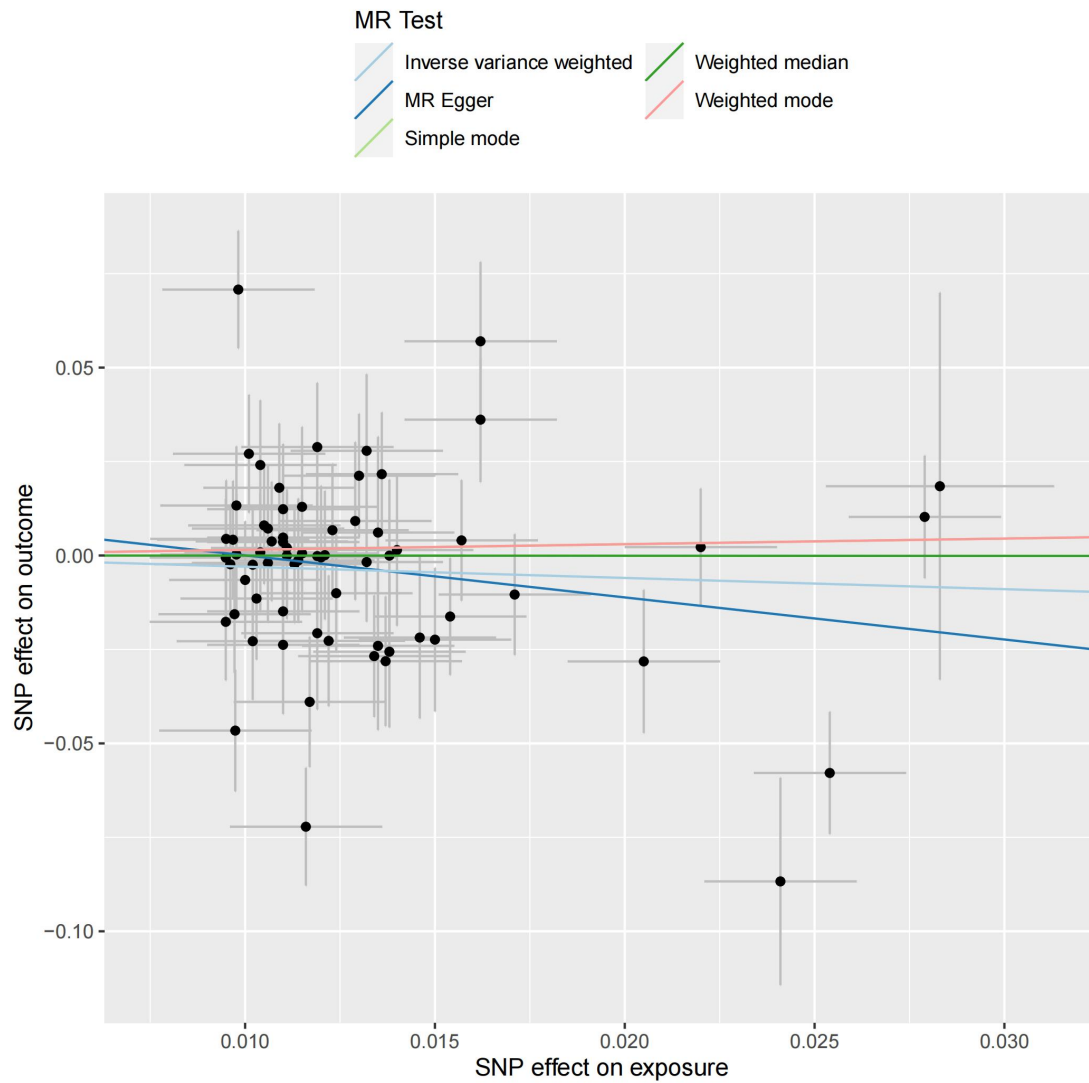

Figure S5. Scatter plot of SNPs associated with AC and their risk of kidney stone after outliers removal with MR-PRESSO .

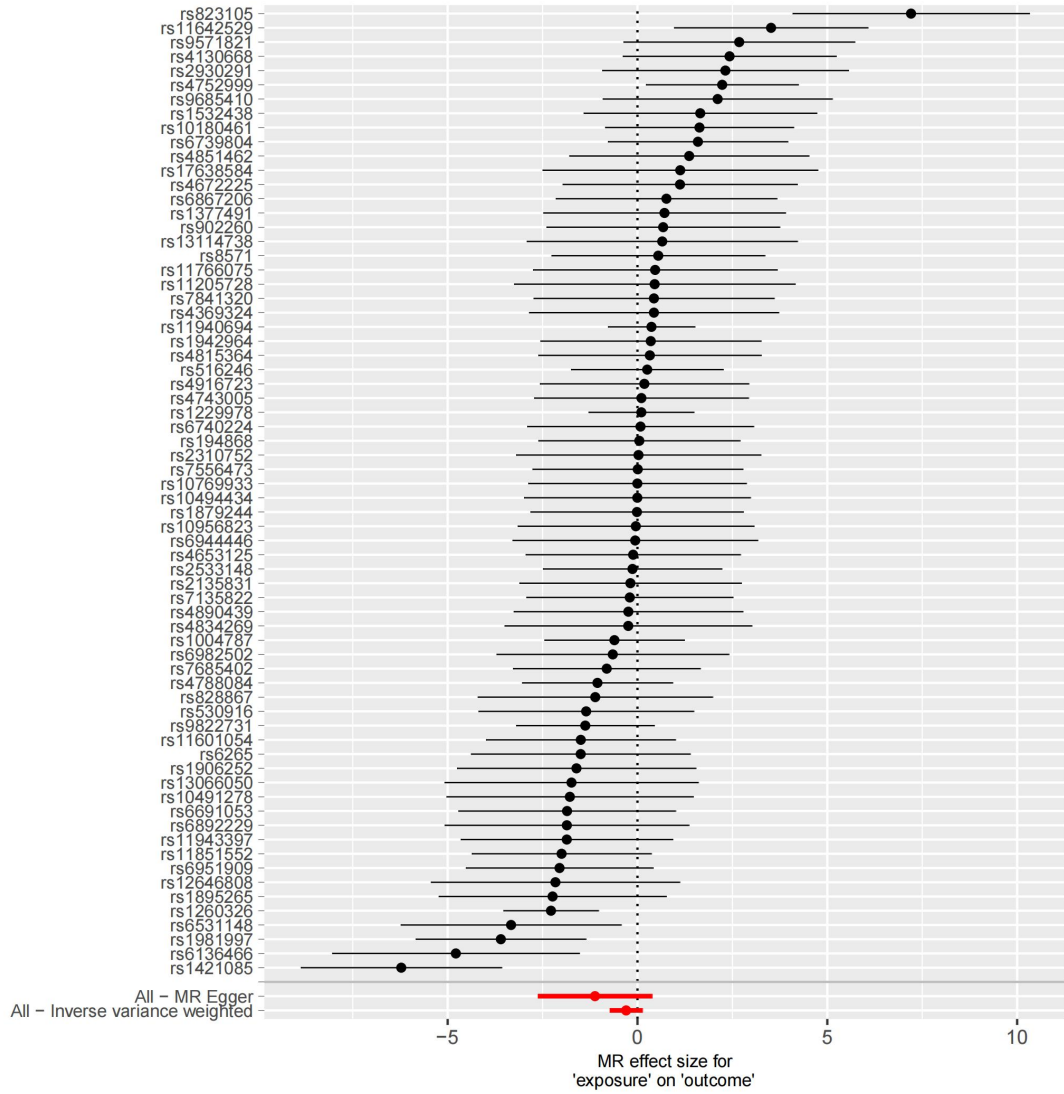

Figure S2. Forest plot of SNPs associated with AC and their risk of kidney stone after outliers removal with MR-PRESSO .

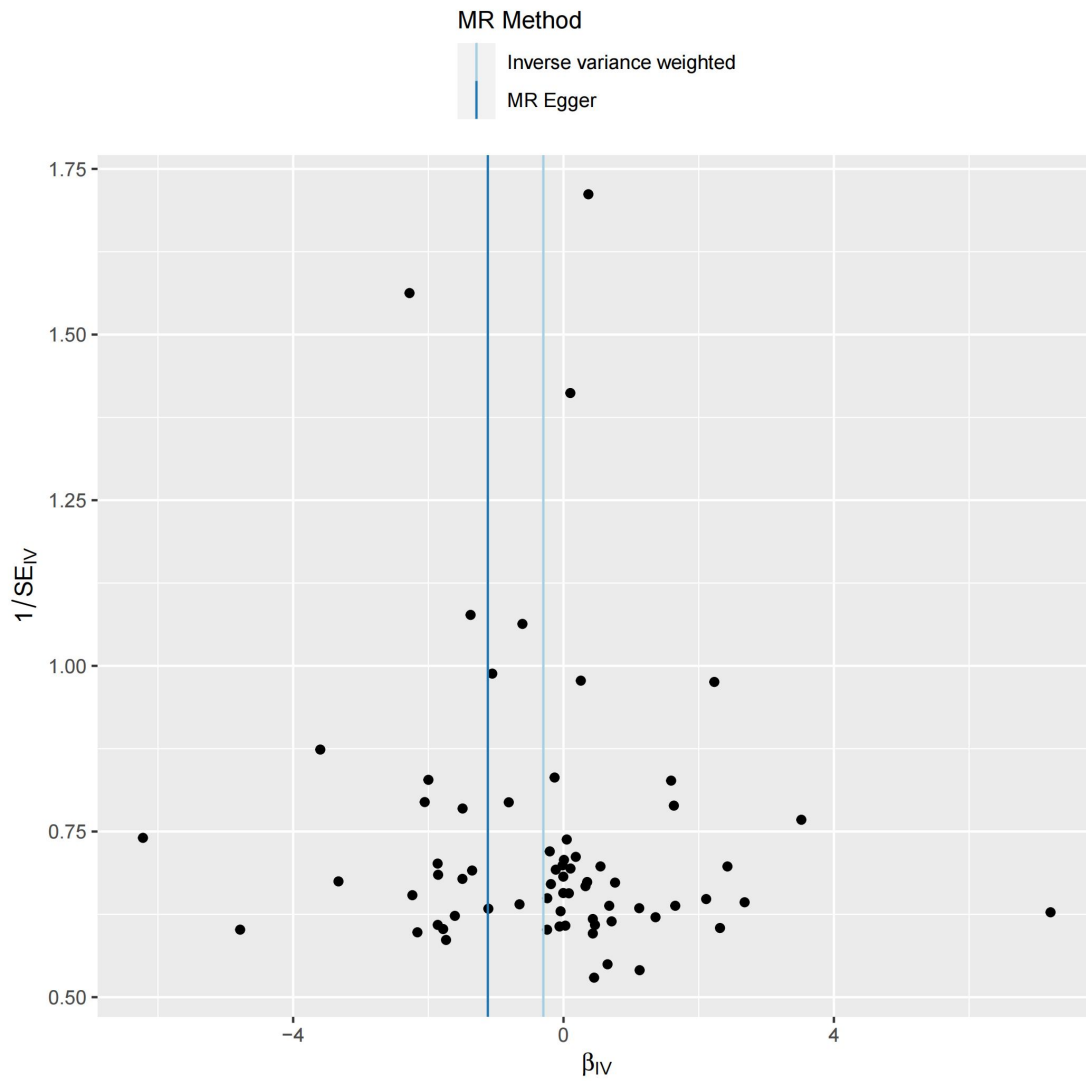

Figure S7. Funnel plot of SNPs associated with AC and their risk of kidney stone after outliers removal with MR-PRESSO .

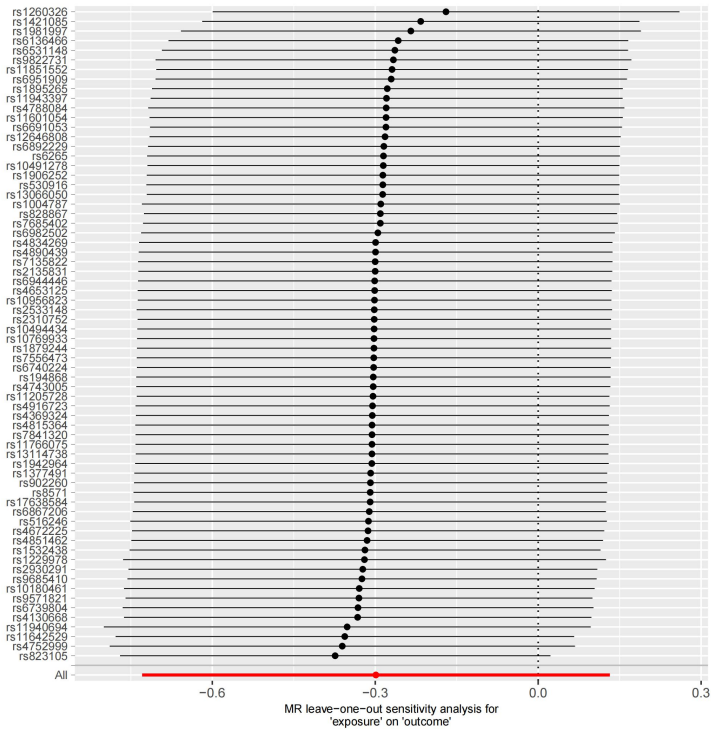

Figure S8. Leave-one-out of SNPs associated with AC and their risk of kidney stone after outliers removal with MR-PRESSO.



Supplementary Table 1. 99 SNPs associated with major AIF

| SNP        | Chromosome | Position  | Effect allele | Other allele | Frequency | Beta       | Se         | P         | samplesize |
|------------|------------|-----------|---------------|--------------|-----------|------------|------------|-----------|------------|
| rs780569   | 1          | 4569436   | A             | T            | 0.70882   | 0.0198033  | 0.00336454 | 4.00E-09  | 462346     |
| rs4503294  | 1          | 940096    | T             | C            | 0.565333  | 0.0181476  | 0.00307049 | 3.40E-09  | 462346     |
| rs28787109 | 1          | 51218695  | A             | G            | 0.40423   | 0.0178107  | 0.00308461 | 7.70E-09  | 462346     |
| rs2244598  | 1          | 216681000 | C             | T            | 0.605114  | -0.018378  | 0.00311907 | 3.80E-09  | 462346     |
| rs4417025  | 1          | 35363679  | A             | G            | 0.361153  | -0.0188379 | 0.00316516 | 2.70E-09  | 462346     |
| rs7514579  | 1          | 94051350  | C             | A            | 0.232457  | 0.0196672  | 0.00359788 | 4.60E-08  | 462346     |
| rs2717063  | 2          | 58110969  | A             | C            | 0.585731  | -0.0203704 | 0.00308457 | 4.00E-11  | 462346     |
| rs6727281  | 2          | 65558588  | T             | C            | 0.184023  | -0.024322  | 0.00391964 | 5.50E-10  | 462346     |
| rs780094   | 2          | 27741237  | C             | T            | 0.615206  | -0.0509938 | 0.00310506 | 1.30E-60  | 462346     |
| rs13390019 | 2          | 97797680  | C             | T            | 0.134041  | 0.0296116  | 0.00449182 | 4.30E-11  | 462346     |
| rs10188314 | 2          | 215402926 | T             | C            | 0.470852  | -0.0197869 | 0.00303605 | 7.20E-11  | 462346     |
| rs4241258  | 2          | 74226102  | T             | C            | 0.13763   | 0.0250636  | 0.00440325 | 1.30E-08  | 462346     |
| rs72769229 | 2          | 2220795   | T             | A            | 0.154942  | -0.0231352 | 0.00419154 | 3.40E-08  | 462346     |
| rs17662759 | 2          | 193989223 | C             | T            | 0.089115  | 0.0301348  | 0.00546031 | 3.40E-08  | 462346     |
| rs1991083  | 2          | 23887437  | T             | C            | 0.679886  | -0.0223925 | 0.00325813 | 6.30E-12  | 462346     |
| rs473098   | 2          | 45139779  | T             | C            | 0.557689  | -0.0217406 | 0.00304345 | 9.10E-13  | 462346     |
| rs9829192  | 3          | 38569463  | T             | G            | 0.435133  | 0.0169324  | 0.00305032 | 2.80E-08  | 462346     |
| rs76082653 | 3          | 49029468  | T             | C            | 0.054327  | 0.0464269  | 0.00668673 | 3.80E-12  | 462346     |
| rs262240   | 3          | 68408109  | T             | C            | 0.468553  | -0.017207  | 0.00303483 | 1.40E-08  | 462346     |
| rs9814516  | 3          | 85407980  | T             | G            | 0.237423  | -0.0251117 | 0.00355589 | 1.60E-12  | 462346     |
| rs7610856  | 3          | 71579022  | A             | C            | 0.429053  | -0.023864  | 0.00307022 | 7.70E-15  | 462346     |
| rs1515591  | 3          | 174213976 | G             | T            | 0.383186  | 0.0182303  | 0.00311635 | 4.90E-09  | 462346     |
| rs1228589  | 3          | 131634826 | A             | G            | 0.246133  | 0.0210699  | 0.00352806 | 2.30E-09  | 462346     |
| rs28622224 | 4          | 55088093  | T             | C            | 0.280364  | -0.0186203 | 0.00336834 | 3.20E-08  | 462346     |
| rs13135092 | 4          | 103198082 | G             | A            | 0.083483  | 0.0438341  | 0.00549884 | 1.60E-15  | 462346     |
| rs11940694 | 4          | 39414993  | G             | A            | 0.604193  | -0.0437138 | 0.00311609 | 1.00E-44  | 462346     |
| rs362307   | 4          | 3241845   | T             | C            | 0.074582  | 0.0433047  | 0.00580219 | 8.40E-14  | 462346     |
| rs1229984  | 4          | 100239319 | C             | T            | 0.97277   | -0.261708  | 0.00918496 | 1.40E-178 | 462346     |
| rs13102973 | 4          | 135900688 | C             | T            | 0.61881   | -0.0194072 | 0.00311875 | 4.90E-10  | 462346     |
| rs62339673 | 4          | 184828533 | A             | C            | 0.626705  | 0.0182943  | 0.00315406 | 6.60E-09  | 462346     |
| rs34811474 | 4          | 25408838  | A             | G            | 0.230728  | -0.0201809 | 0.00359305 | 1.90E-08  | 462346     |
| rs2159935  | 4          | 55521017  | A             | G            | 0.490369  | -0.0185742 | 0.00302582 | 8.30E-10  | 462346     |
| rs62305780 | 4          | 100290815 | G             | C            | 0.102253  | -0.0485216 | 0.00506585 | 9.90E-22  | 462346     |
| rs13178443 | 5          | 145615275 | T             | C            | 0.276349  | -0.0186516 | 0.00338983 | 3.80E-08  | 462346     |
| rs11750777 | 5          | 166830787 | A             | G            | 0.209454  | -0.020493  | 0.00372613 | 3.80E-08  | 462346     |
| rs4916723  | 5          | 87854395  | C             | A            | 0.420617  | 0.0239479  | 0.00309951 | 1.10E-14  | 462346     |
| rs461599   | 5          | 144136931 | C             | A            | 0.462259  | -0.0191888 | 0.00303977 | 2.70E-10  | 462346     |
| rs56194430 | 5          | 67824690  | T             | C            | 0.16931   | 0.0225403  | 0.00407148 | 3.10E-08  | 462346     |

|             |    |           |   |   |          |            |            |          |        |
|-------------|----|-----------|---|---|----------|------------|------------|----------|--------|
| rs9403297   | 6  | 141705482 | A | G | 0.372967 | 0.0188234  | 0.00313037 | 1.80E-09 | 462346 |
| rs9349379   | 6  | 12903957  | G | A | 0.405493 | -0.0193455 | 0.00308215 | 3.50E-10 | 462346 |
| rs12153855  | 6  | 32074804  | C | T | 0.10497  | 0.0294435  | 0.00493484 | 2.40E-09 | 462346 |
| rs9372625   | 6  | 98344031  | A | G | 0.381706 | -0.0255579 | 0.00312467 | 2.90E-16 | 462346 |
| rs62466318  | 7  | 73042085  | T | C | 0.202827 | -0.0254919 | 0.0037742  | 1.40E-11 | 462346 |
| rs2622167   | 7  | 153486704 | A | G | 0.428653 | -0.0191155 | 0.0030674  | 4.60E-10 | 462346 |
| rs73050128  | 7  | 1961882   | A | C | 0.164488 | -0.0260048 | 0.00409088 | 2.10E-10 | 462346 |
| rs6943160   | 7  | 99872071  | C | T | 0.208646 | 0.020627   | 0.00372774 | 3.10E-08 | 462346 |
| rs4726481   | 7  | 141668403 | T | G | 0.400576 | 0.0217614  | 0.00310188 | 2.30E-12 | 462346 |
| rs9648478   | 7  | 39325802  | A | G | 0.510245 | 0.0168603  | 0.00302891 | 2.60E-08 | 462346 |
| rs2160935   | 8  | 30840651  | T | C | 0.604293 | -0.018718  | 0.00309117 | 1.40E-09 | 462346 |
| rs34440851  | 8  | 87214346  | T | C | 0.157151 | -0.0226831 | 0.00415058 | 4.60E-08 | 462346 |
| rs11787216  | 8  | 142615222 | T | C | 0.369127 | 0.0244162  | 0.00320078 | 2.40E-14 | 462346 |
| rs2977454   | 8  | 141539923 | G | C | 0.124072 | -0.0259222 | 0.00459853 | 1.70E-08 | 462346 |
| rs74679146  | 9  | 16287769  | C | T | 0.074515 | -0.0320735 | 0.00575757 | 2.50E-08 | 462346 |
| rs489062    | 10 | 99715744  | A | G | 0.437454 | 0.0166498  | 0.00305291 | 4.90E-08 | 462346 |
| rs34473884  | 10 | 133761285 | A | G | 0.24819  | -0.0203615 | 0.00350346 | 6.20E-09 | 462346 |
| rs61873510  | 10 | 102626510 | T | G | 0.32785  | 0.0203737  | 0.00330311 | 6.90E-10 | 462346 |
| rs4242715   | 10 | 133986135 | A | G | 0.680585 | -0.0186543 | 0.00324831 | 9.30E-09 | 462346 |
| rs10792669  | 11 | 82688356  | G | A | 0.505254 | 0.0174322  | 0.00304065 | 9.90E-09 | 462346 |
| rs11223617  | 11 | 133780757 | A | G | 0.206155 | 0.0250908  | 0.00375381 | 2.30E-11 | 462346 |
| rs550942    | 11 | 58394154  | T | C | 0.823865 | 0.022401   | 0.00398884 | 2.00E-08 | 462346 |
| rs11039429  | 11 | 47867059  | T | C | 0.454624 | -0.0235595 | 0.00303737 | 8.70E-15 | 462346 |
| rs1666658   | 11 | 121801129 | C | T | 0.392206 | 0.0179674  | 0.00309866 | 6.70E-09 | 462346 |
| rs12312693  | 12 | 57511734  | C | T | 0.451772 | -0.0176811 | 0.00305026 | 6.80E-09 | 462346 |
| rs7302200   | 12 | 56449435  | A | G | 0.339998 | -0.0184222 | 0.00319841 | 8.40E-09 | 462346 |
| rs28768122  | 12 | 123885974 | C | T | 0.759525 | 0.0207     | 0.00355204 | 5.60E-09 | 462346 |
| rs7298932   | 12 | 23727301  | G | A | 0.147849 | -0.0237214 | 0.00431166 | 3.80E-08 | 462346 |
| rs58905411  | 12 | 54623132  | A | G | 0.410052 | -0.0266343 | 0.00307848 | 5.10E-18 | 462346 |
| rs1937522   | 13 | 68080817  | G | A | 0.528054 | 0.0168979  | 0.00303207 | 2.50E-08 | 462346 |
| rs7330939   | 13 | 49971400  | T | C | 0.720352 | -0.0213301 | 0.0034046  | 3.70E-10 | 462346 |
| rs2535911   | 14 | 73523162  | T | C | 0.354749 | -0.0188476 | 0.00316849 | 2.70E-09 | 462346 |
| rs186347    | 14 | 59072226  | T | G | 0.463343 | 0.0179489  | 0.00305071 | 4.00E-09 | 462346 |
| rs80292319  | 15 | 76508632  | C | T | 0.057704 | -0.0393728 | 0.00649583 | 1.40E-09 | 462346 |
| rs117799466 | 15 | 34659517  | C | G | 0.336989 | -0.0196704 | 0.00331968 | 3.10E-09 | 462346 |
| rs34631026  | 16 | 6172126   | T | C | 0.446061 | -0.0169128 | 0.00304832 | 2.90E-08 | 462346 |
| rs72787062  | 16 | 72105844  | A | G | 0.162767 | -0.0281947 | 0.00410324 | 6.40E-12 | 462346 |
| rs35105141  | 16 | 30057148  | T | C | 0.401541 | 0.026345   | 0.00308788 | 1.40E-17 | 462346 |
| rs1421085   | 16 | 53800954  | C | T | 0.403447 | 0.0199392  | 0.00308481 | 1.00E-10 | 462346 |
| rs1104608   | 16 | 73912588  | C | G | 0.426338 | 0.0174212  | 0.00308849 | 1.70E-08 | 462346 |
| rs8043563   | 16 | 19982353  | C | G | 0.737192 | 0.0233654  | 0.00347125 | 1.70E-11 | 462346 |
| rs2411453   | 16 | 28632021  | G | T | 0.597353 | -0.0350793 | 0.00309039 | 7.30E-30 | 462346 |
| rs728538    | 16 | 51205819  | G | T | 0.168868 | 0.0228752  | 0.00406259 | 1.80E-08 | 462346 |
| rs9906502   | 17 | 7615745   | A | G | 0.176998 | 0.0237883  | 0.00396178 | 1.90E-09 | 462346 |

|            |    |          |   |   |          |            |            |          |        |
|------------|----|----------|---|---|----------|------------|------------|----------|--------|
| rs8614     | 17 | 27588806 | A | C | 0.182509 | 0.0247806  | 0.00392537 | 2.70E-10 | 462346 |
| rs4968391  | 17 | 57780943 | T | G | 0.674892 | -0.0192695 | 0.0032265  | 2.30E-09 | 462346 |
| rs9912298  | 17 | 29735752 | C | A | 0.239585 | 0.0205894  | 0.00358993 | 9.70E-09 | 462346 |
| rs17690703 | 17 | 43925297 | T | C | 0.262687 | 0.0250342  | 0.00343021 | 2.90E-13 | 462346 |
| rs650558   | 17 | 40721042 | T | C | 0.247918 | 0.0207362  | 0.0035079  | 3.40E-09 | 462346 |
| rs1893659  | 18 | 21080859 | A | C | 0.459939 | -0.029326  | 0.00305313 | 7.60E-22 | 462346 |
| rs5022348  | 18 | 22639237 | T | C | 0.40703  | 0.0202641  | 0.00357005 | 1.40E-08 | 462346 |
| rs2043677  | 18 | 38313195 | T | C | 0.145599 | 0.0261133  | 0.0043272  | 1.60E-09 | 462346 |
| rs9958320  | 18 | 38269812 | C | T | 0.153147 | 0.0248553  | 0.00427092 | 5.90E-09 | 462346 |
| rs62097995 | 18 | 50843233 | A | T | 0.423591 | 0.0200024  | 0.00306682 | 6.90E-11 | 462346 |
| rs2924321  | 18 | 53125435 | A | G | 0.539592 | -0.0195131 | 0.00305022 | 1.60E-10 | 462346 |
| rs4940926  | 18 | 57732418 | C | T | 0.735045 | -0.0191003 | 0.00344068 | 2.80E-08 | 462346 |
| rs838145   | 19 | 49248730 | A | G | 0.542982 | 0.0219548  | 0.00305549 | 6.70E-13 | 462346 |
| rs6030200  | 20 | 35554361 | A | G | 0.31415  | -0.019529  | 0.00327075 | 2.40E-09 | 462346 |
| rs11700855 | 21 | 34270051 | G | A | 0.093465 | -0.029795  | 0.00523292 | 1.20E-08 | 462346 |
| rs71651683 | 22 | 24828853 | T | C | 0.0142   | -0.0704589 | 0.0127906  | 3.60E-08 | 462346 |
| rs1894544  | 22 | 48881562 | C | G | 0.454379 | 0.0173933  | 0.00304627 | 1.10E-08 | 462346 |

---

Supplementary Table 2. 76 SNPs associated with major AC

| SNP        | Effect allele | Other allele | Frequency | Beta     | Se    | P        | samplesize | F-statistics | select |
|------------|---------------|--------------|-----------|----------|-------|----------|------------|--------------|--------|
| rs7556473  | A             | G            | 0.253     | -0.0121  | 0.002 | 1.15E-09 | 665054     | 13.83533236  | T      |
| rs4653125  | T             | C            | 0.673     | 0.0114   | 0.002 | 1.88E-09 | 628236     | 14.30049357  | T      |
| rs11205728 | C             | T            | 0.153     | -0.0135  | 0.002 | 1.92E-08 | 665054     | 11.80915405  | T      |
| rs2310752  | G             | A            | 0.425     | -0.00977 | 0.002 | 2.57E-08 | 665054     | 11.66332069  | T      |
| rs10494434 | A             | G            | 0.685     | -0.0111  | 0.002 | 3.11E-09 | 665054     | 13.2930446   | T      |
| rs6691053  | C             | T            | 0.208     | -0.0138  | 0.002 | 1.24E-10 | 665054     | 15.68648473  | T      |
| rs823105   | G             | A            | 0.443     | 0.00982  | 0.002 | 1.82E-08 | 665054     | 11.89757263  | T      |
| rs6531148  | T             | C            | 0.758     | -0.0117  | 0.002 | 7.58E-09 | 666978     | 12.55547572  | T      |
| rs1260326  | T             | C            | 0.615     | 0.0254   | 0.002 | 3.16E-46 | 666978     | 76.38739796  | T      |
| rs1004787  | G             | A            | 0.551     | 0.0171   | 0.002 | 1.13E-22 | 666978     | 36.17282403  | T      |
| rs4672225  | C             | T            | 0.276     | -0.011   | 0.002 | 1.26E-08 | 666978     | 12.08953488  | T      |
| rs6739804  | T             | C            | 0.684     | -0.0136  | 0.002 | 2.85E-13 | 666978     | 19.98953626  | T      |
| rs828867   | G             | A            | 0.551     | 0.0103   | 0.002 | 3.44E-09 | 666978     | 13.12349882  | T      |
| rs4851462  | T             | C            | 0.384     | 0.00977  | 0.002 | 4.14E-08 | 666978     | 11.28956263  | T      |
| rs10180461 | T             | C            | 0.382     | -0.013   | 0.002 | 3.21E-13 | 666978     | 19.94895883  | T      |
| rs6740224  | A             | C            | 0.307     | -0.0104  | 0.002 | 3.37E-08 | 666978     | 11.50573806  | T      |
| rs1377491  | A             | T            | 0.798     | 0.0129   | 0.002 | 2.20E-09 | 666978     | 13.41254268  | T      |
| rs13066050 | C             | T            | 0.207     | 0.0119   | 0.002 | 2.50E-08 | 666978     | 11.62287924  | T      |
| rs9822731  | T             | C            | 0.227     | 0.0205   | 0.002 | 2.60E-23 | 666978     | 36.87277166  | T      |
| rs1714507  | T             | A            | 0.553     | -0.0101  | 0.002 | 6.75E-09 | 666978     | 12.60817748  | T      |
| rs1879244  | C             | T            | 0.738     | 0.0119   | 0.002 | 1.32E-09 | 666978     | 13.69081155  | T      |
| rs12646808 | T             | C            | 0.333     | -0.011   | 0.002 | 2.47E-09 | 666978     | 13.43794594  | T      |
| rs11940694 | A             | G            | 0.608     | 0.0279   | 0.002 | 9.51E-56 | 666978     | 92.77418752  | T      |
| rs16854020 | G             | A            | 0.124     | 0.0189   | 0.003 | 6.28E-13 | 666978     | 8.622658737  | F      |
| rs7685402  | G             | T            | 0.468     | 0.0124   | 0.002 | 9.85E-13 | 666978     | 19.14176682  | T      |
| rs1229978  | T             | C            | 0.43      | 0.022    | 0.002 | 1.93E-36 | 666978     | 59.31929739  | T      |
| rs13114738 | C             | T            | 0.072     | -0.0283  | 0.003 | 2.92E-17 | 666978     | 11.89179108  | T      |
| rs4834269  | T             | C            | 0.425     | 0.00961  | 0.002 | 4.07E-08 | 666978     | 11.2844293   | T      |
| rs11943397 | T             | C            | 0.634     | 0.0122   | 0.002 | 1.23E-11 | 666978     | 17.26910981  | T      |
| rs9685410  | T             | A            | 0.816     | -0.0132  | 0.002 | 4.00E-09 | 666978     | 13.08076259  | T      |
| rs6867206  | T             | C            | 0.429     | -0.0105  | 0.002 | 1.93E-09 | 666978     | 13.50359777  | T      |
| rs4916723  | A             | C            | 0.423     | -0.0111  | 0.002 | 2.74E-10 | 666978     | 15.03628784  | T      |
| rs10491278 | A             | C            | 0.166     | -0.0135  | 0.002 | 2.96E-08 | 611077     | 12.61592867  | T      |
| rs6892229  | T             | G            | 0.545     | -0.00949 | 0.002 | 4.86E-08 | 666978     | 11.16648011  | T      |
| rs17638584 | G             | T            | 0.23      | 0.0115   | 0.002 | 2.10E-08 | 666978     | 11.710908    | T      |
| rs1895265  | A             | C            | 0.516     | 0.0102   | 0.002 | 3.42E-09 | 666978     | 12.99189698  | T      |
| rs1906252  | C             | A            | 0.482     | 0.00972  | 0.002 | 2.05E-08 | 666978     | 11.7946677   | T      |
| rs11766075 | T             | C            | 0.447     | 0.0095   | 0.002 | 4.87E-08 | 666978     | 11.15464698  | T      |

|            |   |   |       |          |       |          |        |             |   |
|------------|---|---|-------|----------|-------|----------|--------|-------------|---|
| rs6951909  | C | T | 0.264 | -0.0137  | 0.002 | 3.01E-12 | 666978 | 18.23490272 | T |
| rs10155966 | A | G | 0.127 | -0.0158  | 0.003 | 1.18E-09 | 666978 | 6.150668596 | F |
| rs194868   | T | C | 0.47  | 0.0115   | 0.002 | 3.66E-11 | 666978 | 16.4720949  | T |
| rs6944446  | G | A | 0.53  | 0.00949  | 0.002 | 4.47E-08 | 666978 | 11.21714047 | T |
| rs2533148  | T | C | 0.485 | 0.0132   | 0.002 | 3.00E-14 | 666978 | 21.76104271 | T |
| rs7841320  | G | A | 0.482 | 0.00968  | 0.002 | 2.31E-08 | 666978 | 11.69779029 | T |
| rs10956823 | G | T | 0.776 | 0.012    | 0.002 | 8.38E-09 | 666978 | 12.51552532 | T |
| rs6982502  | C | T | 0.527 | 0.01     | 0.002 | 7.07E-09 | 666978 | 12.46374553 | T |
| rs4743005  | G | A | 0.178 | -0.014   | 0.002 | 5.57E-10 | 666978 | 14.33923327 | T |
| rs2789514  | G | A | 0.879 | 0.0145   | 0.003 | 4.13E-08 | 666978 | 4.969350957 | F |
| rs4369324  | G | T | 0.254 | -0.011   | 0.002 | 3.25E-08 | 666978 | 11.46394466 | T |
| rs10769933 | G | C | 0.82  | -0.0138  | 0.002 | 8.71E-10 | 666978 | 14.05472602 | T |
| rs6265     | C | T | 0.183 | -0.0146  | 0.002 | 6.63E-11 | 666978 | 15.93521531 | T |
| rs4752999  | C | T | 0.325 | -0.0162  | 0.002 | 1.63E-18 | 666978 | 28.78754364 | T |
| rs7118897  | G | A | 0.26  | -0.0114  | 0.002 | 4.23E-08 | 602156 | 12.50237005 | T |
| rs11601054 | G | A | 0.358 | -0.015   | 0.002 | 7.76E-17 | 666978 | 25.85747488 | T |
| rs11605078 | C | T | 0.124 | 0.0144   | 0.003 | 3.84E-08 | 666978 | 5.005416474 | F |
| rs530916   | A | G | 0.565 | 0.011    | 0.002 | 4.22E-10 | 650123 | 14.86968185 | T |
| rs2135831  | A | G | 0.542 | -0.0106  | 0.002 | 1.18E-09 | 666978 | 13.94614826 | T |
| rs7135822  | G | A | 0.479 | -0.0113  | 0.002 | 8.04E-11 | 666978 | 15.9334272  | T |
| rs902260   | G | T | 0.617 | -0.0106  | 0.002 | 2.62E-09 | 666978 | 13.27617643 | T |
| rs9571821  | G | T | 0.588 | -0.0101  | 0.002 | 9.74E-09 | 666978 | 12.35645914 | T |
| rs11851552 | C | T | 0.714 | -0.0134  | 0.002 | 2.71E-12 | 666978 | 18.33388409 | T |
| rs11638215 | A | C | 0.643 | -0.0108  | 0.002 | 1.94E-09 | 666977 | 13.38764289 | T |
| rs2930291  | G | A | 0.357 | -0.0104  | 0.002 | 7.90E-09 | 666977 | 12.41431192 | T |
| rs1532438  | C | G | 0.33  | 0.0109   | 0.002 | 3.65E-09 | 666977 | 13.13466477 | T |
| rs17177078 | C | T | 0.06  | -0.0263  | 0.004 | 4.96E-13 | 665054 | 4.876435591 | F |
| rs4788084  | C | T | 0.421 | -0.0154  | 0.002 | 2.08E-18 | 665054 | 28.90611163 | T |
| rs1421085  | T | C | 0.41  | -0.0116  | 0.002 | 8.00E-11 | 648199 | 16.27539043 | T |
| rs11642529 | G | C | 0.145 | 0.0162   | 0.002 | 5.07E-11 | 665054 | 16.26834852 | T |
| rs8571     | G | A | 0.302 | 0.0123   | 0.002 | 6.52E-11 | 665054 | 15.9459978  | T |
| rs4130668  | T | C | 0.775 | 0.0119   | 0.002 | 1.77E-08 | 645018 | 12.34681993 | T |
| rs1981997  | G | A | 0.205 | -0.0241  | 0.002 | 2.42E-29 | 666978 | 47.33197163 | T |
| rs4890439  | G | A | 0.386 | 0.0102   | 0.002 | 1.06E-08 | 666978 | 12.32913901 | T |
| rs1942964  | T | G | 0.494 | -0.0107  | 0.002 | 3.89E-09 | 611077 | 14.30947742 | T |
| rs516246   | C | T | 0.487 | 0.0157   | 0.002 | 1.74E-19 | 665346 | 30.791754   | T |
| rs6136466  | C | T | 0.402 | -0.00974 | 0.002 | 3.50E-08 | 666978 | 11.40305654 | T |
| rs4815364  | G | A | 0.618 | 0.011    | 0.002 | 5.75E-10 | 666978 | 14.28286102 | T |

---
